# Supplementary material for: Correlation analysis of quantitative MRI measurements of thigh muscles with histopathology in patients with idiopathic inflammatory myopathy
Source: PubMed Central journal article supplement (PMC10435435; doi:10.1186/s41747-023-00350-z), 2023-08-17
Supplement: 41747_2023_350_MOESM1_ESM.pdf [file 41747_2023_350_MOESM1_ESM.pdf]

**ELECTRONIC SUPPLEMENTARY MATERIAL**

***Correlation analysis of quantitative MRI measurements of thigh muscles  
with histopathology in patients with idiopathic inflammatory myopathy***

**Table S1.** Inter-observer agreements of semi-quantify histopathological findings.

|                 | <b>Fat tissue</b> | <b>Myofiber size<br/>variation</b> | <b>Myofiber<br/>necrosis</b> | <b>Inflammatory<br/>cells</b> | <b>Connective<br/>tissues</b> | <b>ACP</b>  | <b>CD4</b>  | <b>CD68</b> | <b>MHC-1</b> | <b>Complement<br/>components</b> |
|-----------------|-------------------|------------------------------------|------------------------------|-------------------------------|-------------------------------|-------------|-------------|-------------|--------------|----------------------------------|
| <b>Reader 3</b> | 1.77 ± 1.24       | 2.46 ± 1.20                        | 1.77 ± 1.09                  | 1.85 ± 1.57                   | 1.77 ± 1.17                   | 1.85 ± 1.28 | 1.30 ± 0.82 | 2.50 ± 0.85 | 2.30 ± 1.70  | 1.50 ± 1.27                      |
| <b>Reader 4</b> | 1.69 ± 1.03       | 2.31 ± 1.25                        | 1.62 ± 1.04                  | 1.77 ± 1.46                   | 1.62 ± 1.26                   | 1.62 ± 1.19 | 1.10 ± 0.74 | 2.20 ± 0.79 | 2.40 ± 1.43  | 1.20 ± 1.14                      |
| <b>κ value</b>  | 0.927             | 0.639                              | 0.589                        | 0.753                         | 0.841                         | 0.491       | 0.744       | 0.651       | 0.128        | 0.444                            |
